# Supplementary material for: Kinetics of Oil Absorption and Moisture Loss during Deep-Frying of Pork Skin with Different Thickness
Source: MDPI journal article supplement (doi:10.3390/foods10123029), 2021-12-06
Supplement: s1 [file s1]

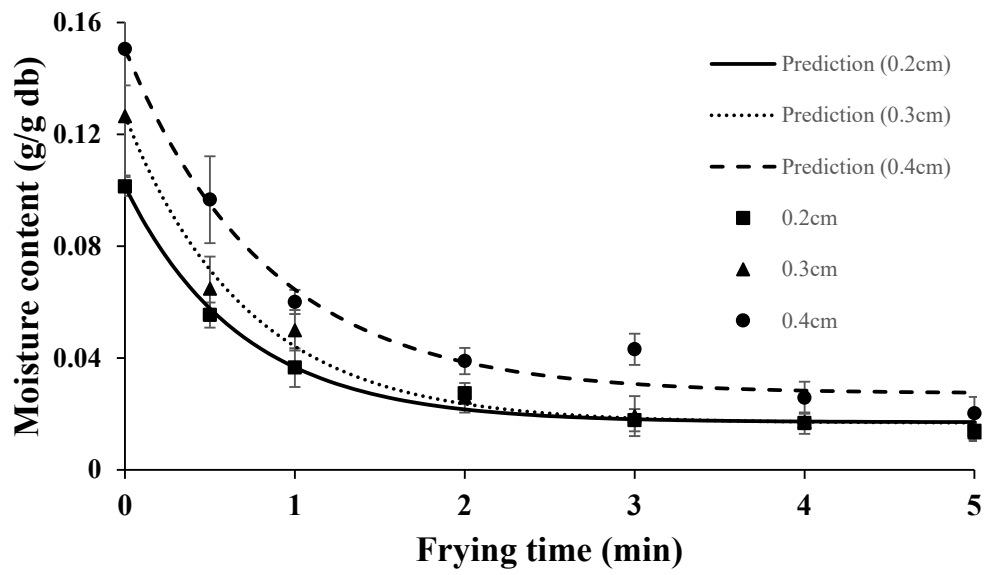

**Figure S1.** Moisture content of fried pork rind with different thickness and frying time. Experimental data and predicted by model equation (1).

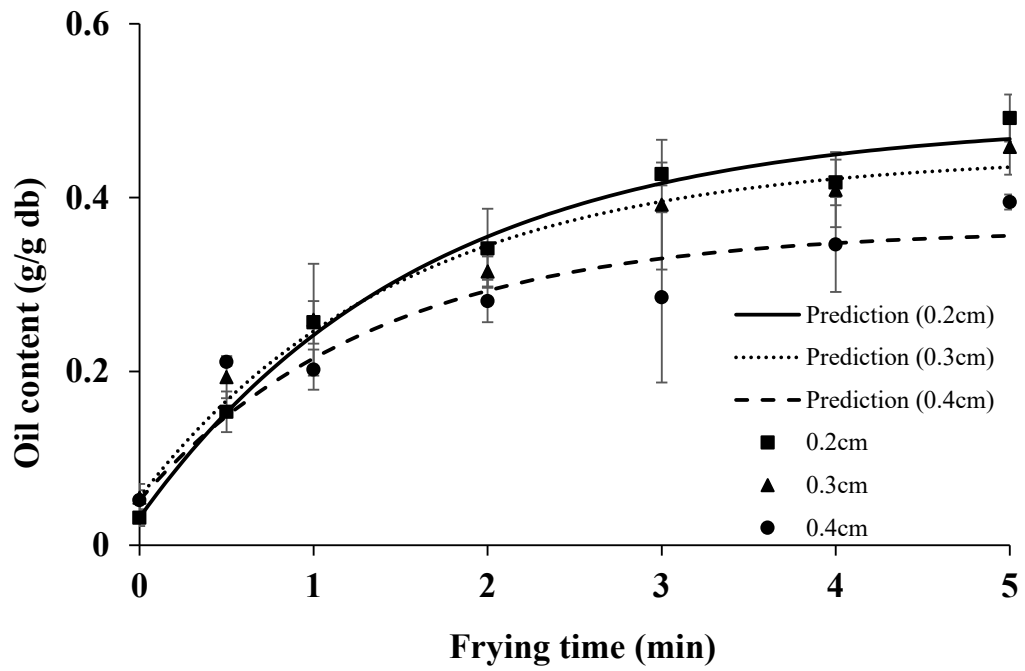

**Figure S2.** Oil content of fried pork rind with different thickness and frying time. Experimental data and predicted by model equation (2).

**Table S1.** The correlation coefficient between the frying time and overall properties of fried pork rind

| <b>a</b>               | <b>Frying time</b> | <b>Water content</b> | <b>Oil content</b> | <b>Breaking force</b> | <b>Water activity</b> | <b>The puffing ratio</b> | <b>Thickness after frying</b> |
|------------------------|--------------------|----------------------|--------------------|-----------------------|-----------------------|--------------------------|-------------------------------|
| Frying time            | 1                  |                      |                    |                       |                       |                          |                               |
| Water content          | -0.796**           | 1                    |                    |                       |                       |                          |                               |
| Oil content            | 0.857**            | -0.802**             | 1                  |                       |                       |                          |                               |
| Breaking force         | -0.506             | 0.757**              | -0.571**           | 1                     |                       |                          |                               |
| Water activity         | -0.790             | 0.943**              | -0.770**           | 0.731**               | 1                     |                          |                               |
| The puffing ratio      | -0.008             | -0.361**             | 0.006              | -0.412**              | -0.361                | 1                        |                               |
| Thickness after frying | 0.378**            | -0.129               | 0.134              | 0.067                 | -0.138                | -0.180                   | 1                             |
| <b>b</b>               | <b>Frying time</b> | <b>Water content</b> | <b>Oil content</b> | <b>Breaking force</b> | <b>Water activity</b> | <b>The puffing ratio</b> | <b>Thickness after frying</b> |
| Frying time            | 1                  |                      |                    |                       |                       |                          |                               |
| Water content          | -0.803**           | 1                    |                    |                       |                       |                          |                               |
| Oil content            | 0.884**            | -0.891**             | 1                  |                       |                       |                          |                               |
| Breaking force         | -0.645**           | 0.895**              | -0.759**           | 1                     |                       |                          |                               |
| Water activity         | -0.762**           | 0.951**              | -0.810**           | 0.866**               | 1                     |                          |                               |
| The puffing ratio      | -0.008             | -0.357**             | 0.006              | -0.400**              | -0.363**              | 1                        |                               |
| Thickness after frying | 0.593**            | -0.591**             | 0.566**            | -0.458**              | -0.502**              | -0.180                   | 1                             |

\*\* indicate significance at  $p < 0.01$ . (a) Not include  $t = 0$  in statistical analysis (b) Include  $t = 0$  in statistical analysis.

**Table S2.** The correlation coefficient between the thickness and overall properties of fried pork rind under the similar water content.

|                        | <b>thickness</b> | <b>Water content</b> | <b>Oil content</b> | <b>Breaking force</b> | <b>Water activity</b> | <b>The puffing ratio</b> | <b>Thickness after frying</b> |
|------------------------|------------------|----------------------|--------------------|-----------------------|-----------------------|--------------------------|-------------------------------|
| thickness              | 1                |                      |                    |                       |                       |                          |                               |
| Water content          | 0.266            | 1                    |                    |                       |                       |                          |                               |
| Oil content            | -0.519           | -0.068               | 1                  |                       |                       |                          |                               |
| Breaking force         | 0.858**          | 0.442                | -0.446             | 1                     |                       |                          |                               |
| Water activity         | -0.645           | -0.273               | 0.348              | -0.629                | 1                     |                          |                               |
| The puffing ratio      | -0.025           | -0.288               | -0.247             | -0.247                | 0.214                 | 1                        |                               |
| Thickness after frying | 0.917**          | 0.013                | -0.322             | 0.697*                | -0.131                | -0.402                   | 1                             |

\*\* indicate significance at  $p < 0.01$ . \* indicate significance at  $p < 0.05$ .

**Table S3.** The correlation coefficient of the results of fried pork rind's sensory evaluation.

|                       | <b>Appearance</b> | <b>Smell</b> | <b>Flavor</b> | <b>Texture</b> | <b>Greasy Intensity</b> | <b>Overall Acceptability</b> |
|-----------------------|-------------------|--------------|---------------|----------------|-------------------------|------------------------------|
| Appearance            | 1                 |              |               |                |                         |                              |
| Smell                 | 0.235**           | 1            |               |                |                         |                              |
| Flavor                | 0.205**           | 0.425**      | 1             |                |                         |                              |
| Texture               | 0.031             | 0.156*       | 0.472**       | 1              |                         |                              |
| Greasy Intensity      | 0.06              | -0.061       | -0.094        | 0.015          | 1                       |                              |
| Overall Acceptability | 0.190**           | 0.314**      | 0.742**       | 0.666**        | -0.048                  | 1                            |

\*\* indicate significance at  $p < 0$ .
